# Supplementary material for: Nanoencapsulation Enhances Stability, Release Behavior, and Antimicrobial Properties of Sage and Thyme Essential Oils
Source: Research Square preprint supplement (doi:10.21203/rs.3.rs-6005386/v1), 2025-04-14
Supplement: Supplementary file 1 [file 0ca813395e01f26838bf2a83.docx]

**
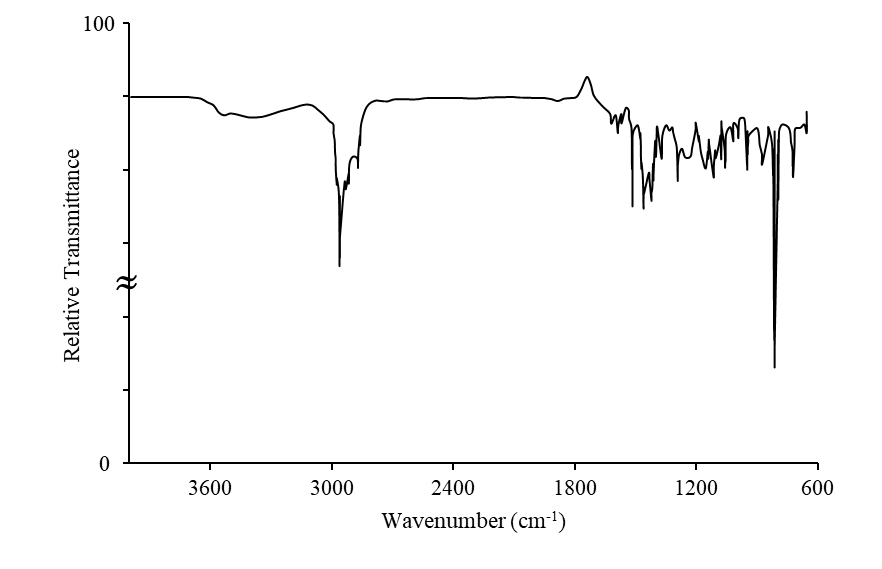
**

**(a)**

**(b)**


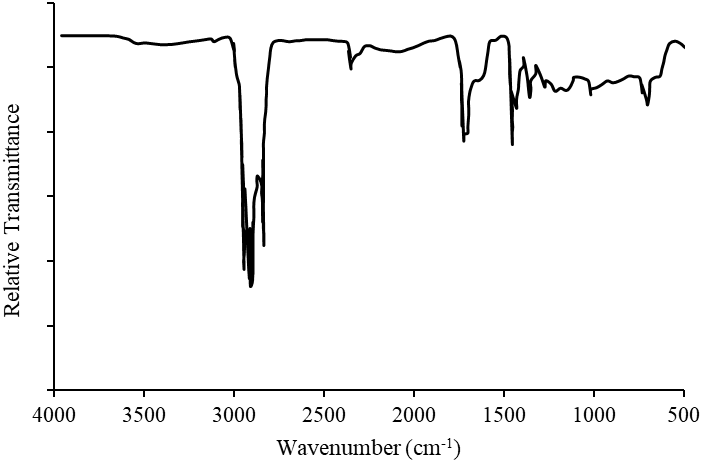


≈

0

100

**Figure S1.** FTIR spectrum of pure EOs (a) *Thyme* and (b) *Sage*

**Table S1.** Equilibrium data for adsorption of *Thyme* EO on HNS and HPN adsorbent at 25°C

| ***C*o (ppm)** | **HNS** | |  | **HPN** | |
| --- | --- | --- | --- | --- | --- |
| ***C*e (ppm)** | ***qe* (mg/g ads)** |  | ***C*e (ppm)** | ***qe* (mg/g ads)** |
| 24 | 20.28 | 0.61 |  | 22.84 | 0.19 |
| 32 | 27.15 | 0.80 |  | 28.06 | 0.65 |
| 40 | 34.26 | 0.95 |  | 35.11 | 0.81 |
| 60 | 50.50 | 1.58 |  | 50.34 | 1.60 |
| 80 | 64.05 | 2.65 |  | 65.34 | 2.44 |
| 120 | 94.89 | 4.18 |  | 98.18 | 3.63 |
| 160 | 128.06 | 5.32 |  | 128.06 | 5.32 |

**Table S2.** Parameters of various isotherms for adsorption of *Thyme* EO on HNS and HPN at 25 °C

| **Parameters** |  | **HNS** | | |  | **HPN** | | |
| --- | --- | --- | --- | --- | --- | --- | --- | --- |
|  | **Langmuir** | **Freundlich** | **Temkin** |  | **Langmuir** | **Freundlich** | **Temkin** |
| *q*m |  | -20.012 | - | - |  | -8.88 | - | - |
| *K*L |  | -0.001 | - | - |  | -0.0029 | - | - |
| *K*F |  | - | 0.016 | - |  | - | 0.0075 | - |
| *n*F |  | - | 0.838 | - |  | - | 0.739 | - |
| *b*T |  | - | - | 941.61 |  | - | - | 885.28 |
| *A*T |  | - | - | 0.048 |  | - | - | 0.0412 |

**Table S3.** Error function values for non-linear fitting of equilibrium adsorption data of *Thyme* EO on Nanocapsules

| **Error Functions** |  | **HNS** | | |  | **HPN** | | |
| --- | --- | --- | --- | --- | --- | --- | --- | --- |
|  | **Langmuir** | **Freundlich** | **Temkin** |  | **Langmuir** | **Freundlich** | **Temkin** |
| *R*² |  | 0.979 | 0.985 | 0.921 |  | 0.981 | 0.989 | 0.948 |
| RMSE |  | 0.286 | 0.243 | 0.563 |  | 0.275 | 0.211 | 0.459 |

**Table S4. Kinetic adsorption data of *Thyme* and *Sage* EOs on HNS and HPN adsorbent at 25 °C and initial concentration of 60 ppm (*Thyme* EO) and 600 ppm (*Sage* EO)**

| **t (min)** |  | ***Thyme* HNS** | |  | ***Thyme* HPN** | |  | ***Sage* HNS** | |  | ***Sage* HPN** | |
| --- | --- | --- | --- | --- | --- | --- | --- | --- | --- | --- | --- | --- |
|  | ***C*t (ppm)** | ***q*t (mg/g)** |  | ***C*t (ppm)** | ***q*t (mg/g)** |  | ***C*t (ppm)** | ***q*t (mg/g)** |  | ***C*t (ppm)** | ***q*t (mg/g)** |
| 5 |  | 56.35 | 0.608 |  | 54.825 | 0.862 |  | 582.000 | 3.000 |  | 574.142 | 4.309 |
| 20 |  | 49.35 | 1.770 |  | 47.787 | 2.035 |  | 537.571 | 10.404 |  | 512.857 | 14.523 |
| 35 |  | 49.50 | 1.750 |  | 49.075 | 1.820 |  | 515.857 | 14.023 |  | 479.000 | 20.166 |
| 50 |  | 48.58 | 1.902 |  | 48.037 | 1.993 |  | 515.000 | 14.166 |  | 480.571 | 19.904 |
| 65 |  | 45.63 | 2.390 |  | 47.037 | 2.160 |  | 507.571 | 15.404 |  | 463.142 | 22.809 |
| 80 |  | 46.01 | 2.330 |  | 46.762 | 2.206 |  | 505.428 | 15.761 |  | 444.142 | 25.976 |
| 95 |  | 44.53 | 2.570 |  | 44.000 | 2.666 |  | 457.142 | 23.809 |  | 438.857 | 26.857 |
| 110 |  | 44.31 | 2.610 |  | 45.275 | 2.454 |  | 464.714 | 22.547 |  | 444.857 | 25.857 |
| 125 |  | 45.27 | 2.450 |  | 43.825 | 2.695 |  | - | - |  | 392.857 | 34.523 |

**Table S5. Different kinetic models for adsorption of EOs onto adsorbents**

| **Kinetic models** | **Equation** | **Parameters** |
| --- | --- | --- |
| Pseudo-ﬁrst-order (PFO) |  |  |
|  |
| Pseudo-second-order (PSO) |  |  |
|  |
| Elovich |  |  |
|  |
| Intraparticle Diffusion |  |  |
| *C* |
| mixed 1,2-order (MOE) |  |  |
|  |
|  |

**Table S6. Parameters of various kinetic models for adsorption of *Thyme* EO on HNS.**

| Parameters | PFO | PSO | Elovich | Intra-particle diffusion | MOE |
| --- | --- | --- | --- | --- | --- |
| *q*e | 2.475 | - | - | - | - |
| *k*1 | 0.0451 | - | - | - | - |
| *q*e | - | 2.904 | - | - | - |
| *k*2*q*e | - | 0.0194 | - | - | - |
| *at* | - | - | 0.295 | - | - |
| *bt* | - | - | 1.535 | - | - |
| *k*p | - | - | - | 0.20 | - |
| *C* | - | - | - | 0.528 | - |
| *q*e | - | - | - | - | 2.543 |
| *k*1 | - | - | - | - | 0.037 |
| *F*2 | - | - | - | - | -0.183 |

**Table S7. Parameters of various kinetic models for adsorption of *Thyme* EO on HPN at 25°C.**

| **Parameters** | **PFO** | **PSO** | **Elovich** | **Intra-particle diffusion** | **MOE** |
| --- | --- | --- | --- | --- | --- |
| *q*e | 2.356 | - | - | - | - |
| *k*1 | 0.074 | - | - | - | - |
| *q*e | - | 2.691 | - | - | - |
| *k*2 | - | 0.034 | - | - | - |
| *a* | - | - | 0.582 | - | - |
| *b* | - | - | 1.901 | - | - |
| *k*d | - | - | - | 0.171 | - |
| *c* | - | - | - | 0.801 | - |
| *q*e | - | - | - | - | 2.595 |
| *k*1 | - | - | - | - | 0.032 |
| *F*2 | - | - | - | - | -0.531 |

**Table S8. Parameters of various kinetic models for adsorption of *Sage* EO on HNS at 25°C**

| **Parameters** | **PFO** | **PSO** | **Intra-particle diffusion** | **MOE** |
| --- | --- | --- | --- | --- |
| *q*e | 22.299 | - | - | - |
| *k*1 | 0.023 | - | - | - |
| *q*e | - | 28.775 | - | - |
| *k*2 | - | 0.00078 | - | - |
| *k*d | - | - | 2.0043 | - |
| *c* | - | - | 0.064 | - |
| *q*e | - | - | - | 22.0062 |
| *k*1 | - | - | - | 0.022 |
| *F*2 | - | - | - | -0.112 |

**Table S9. Parameters of various kinetic models for adsorption of *Sage* essential oil on polymer nanocapsules at 25 °C**

| **Parameters** | **PFO** | **PSO** | **Intra-particle diffusion** | **MOE** |
| --- | --- | --- | --- | --- |
| *q*e | 30.561 | - | - | - |
| *k*1 | 0.0255 | - | - | - |
| *q*e | - | 39.312 | - | - |
| *k*2 | - | 0.00063 | - | - |
| *k*d | - | - | 2.8005 | - |
| *c* | - | - | 0.462 | - |
| *q*e | - | - | - | 32.549 |
| *k*1 | - | - | - | 0.0204 |
| *F*2 | - | - | - | -0.114 |
